# Supplementary material
Source: publisher site journal article supplement (https://www.spandidos-publications.com/5470/downloadSupplementary)
Supplement: Supplementary file 1 [file downloadSupplementary]

## Sheet: Sheet1
Table S1. Detailed information of studies included in meta-analysis.
First author, year	Study period	Study design	Country	Covariant	(Refs.)
Nakamura et al, 2016	July 2014 to July 2016	Retrospective cohort	Japan	ANC, ALC, ACE, LDH	(36)
Oya et al, 2017	January 2015 to January 2017	Retrospective cohort	Japan	PS, LDH, smoking status, PD-L1 expression	(37)
Naqash et al, 2018	April 2015 to March 2017	Retrospective cohort	USA	NLR and Prognostic Nutritional Index	(38)
Tanizaki et al, 2018	December 2015 to August 2016	Retrospective cohort	Japan	ANC, ALC, ACE, LDH	(25)
Ishihara et al, 2019	June 2013 to June 2019	Retrospective cohort	Japan	NLR, ratio of monocytes to lymphocytes, ratio of platelets to lymphocytes, absolute eosinophil count, absolute monocyte count	(39)
Yasuoka et al, 2019	January to October 2018	Retrospective cohort	Japan	Liver metastasis, PS	(40)
Laino et al, 2020					(41)
Cohort 1	January 2013 to May 2021	CheckMate-066 (NCT01721772)	USA	IL-6, NLR
Cohort 2	June 2013 to August 2021	Checkmate-067 (NCT01844505)	USA	IL-6, NLR
Cohort 3	January 2013 to May 2021	Retrospective cohort	USA	IL-6, NLR
Cohort 4	June 2013 to August 2021	Retrospective cohort	USA	IL-6, NLR
Tamura et al, 2020	January 2018 to April 2019.	Retrospective cohort	Japan	PS, liver metastasis, hemoglobin level, NLR	(42)
Adachi et al, 2019	December 2015 to December 2018	Retrospective cohort	Japan	PS, smoking status, liver metastasis, pleural effusion and steroid administration levels	(43)
Suzuki et al, 2019	December 2016 to February 2019	Retrospective cohort	Japan	NLR	(44)
Inomata et al, 2018	January 2015 to 30 May 2018	Retrospective cohort	Japan	PS, maximum tumor diameter, LDH, ALC, ANC	(45)
Noguchi et al, 2020	N/A	Retrospective cohort	Japan	PS, sCD163, IL-34, MMP-1, MMP-2, sTNF-R1, sTNF-R2	(46)
Taniguchi et al, 2017	December 2015 to July 2016	Retrospective cohort	Japan	PS, LDH	(47)
ANC, absolute neutrophil count; ALC, absolute lymphocyte count; ACE, absolute count of monocytes and eosinophils; LDH, lactate dehydrogenase; PS, physical state; NLR, ratio of neutrophils to lymphocytes; PD-L1, programmed death-ligand 1.
